# Supplementary material
Source: publisher figshare collection journal article supplement (https://frontiersin.figshare.com/ndownloader/files/18163220)
Supplement: Supplementary file 1 [file 18163220]

## Sheet: chemsum
	Min.	1st Qu.	Median	Mean	3rd Qu.	Max.
Ammonium (mg L-1)	0.004	0.01	0.02	0.0671	0.06	1.13
Kjeldahl nitrogen (mg L-1)	0.4	0.5	0.5	0.5482	0.5	1.4667
Organic carbon (mg L-1)	0.5	1.525	2.4	2.49	3.2	6.167
Conductivity (µS cm-1)	25	143.4	279	328.4	395.2	2607.8
BOD5 (mg L-1)	0.5	0.7	1.1	1.173	1.359	3
Total suspended solids (mg L-1)	1	2	3.15	7	7.75	65
Nitrates (mg L-1)	0.475	3.017	4.5	6.327	8.1	31
Nitrites (mg L-1)	0.01	0.01	0.02	0.0496	0.0483	0.53
Orthophosphate (mg L-1)	0.01	0.035	0.072	0.0991	0.14	0.405
Dissolved oxygen (mg L-1)	4.267	9.246	10.3	10.522	11.752	18
Total phosphorus (mg L-1)	0.006	0.019	0.037	0.0494	0.0582	0.25
Oxygen saturation (%)	47.7	95.4	101.2	101.5	106.3	161
Temperature (°C)	1.3	7.6	14.4	13.3	18.4	24.4
Turbidity (NFU)	0.4	1.53	3.1	6.59	5.15	62.5
pH	5.7	7.64	7.9	7.86	8.15	9.35
